# Supplementary material
Source: publisher site journal article supplement (https://static.cambridge.org/content/id/urn:cambridge.org:id:article:S104161021800220X/resource/name/S104161021800220X_supp001.docx)
Supplement: Supplementary file 1 [file S104161021800220X_supp001.docx]

**Appendix A3 (.docx, 14.3KB):**

Description: Persons with dementia and their caregivers can select from this list of common symptoms the ones that are important to them for monitoring. In addition to the 61 symptoms provided, users can enter their own personalized symptoms.

**Appendix A3.** The 61 common dementia symptoms with the SymptomGuide™ (SG) library

| Symptom |
| --- |
| Aggression |
| Appetite |
| Delusions and Paranoia |
| Anxiety and Worry |
| Disorientation to Place |
| Bathing |
| Dressing |
| Disorientation to Time |
| Hallucinations |
| Inappropriate Language and Behaviour |
| Obsessive Behaviour |
| Repetitive Behaviour |
| Wandering |
| Financial Management |
| Household Chores |
| Meal Preparation/Cooking |
| Operating Gadgets/Appliances |
| Personal Care/Hygiene |
| Shopping |
| Sleep Disturbances |
| Telephone Use |
| Driving |
| Looking After Grandchildren |
| Social Interaction/ Withdrawal |
| Spirituality and Religion |
| Language Difficulty/Expression/Word Finding |
| Memory for Names and Faces |
| Memory of Past Events |
| Memory of Recent Events |
| Misplacing or Losing Objects |
| Repetitive Questions/ Stories |
| Activities with Other People |
| Hobbies |
| Interaction with Friends and Family |
| Interaction With Strangers |
| Travel and Vacationing |
| Writing |
| Independence |
| Insensitivity |
| Insight (Others/Environment) |
| Interest/Initiative (lack of) |
| Irritability/Frustration |
| Low Mood |
| Low Self Esteem |
| Personality Changes |
| Restlessness |
| Self-Awareness |
| Balance |
| Eating |
| Incontinence |
| Mobility |
| Physical Complaints |
| Sensory Input |
| Attention/Concentration (lack of) |
| Following Instructions |
| Judgment |
| Unsafe Actions |
| Decision Making |
| Comprehension/ Understanding |
| Reading |
| Inappropriate Sexual Behaviour |

© DementiaGuide Inc., 2006. Used with permission.
